# Supplementary material
Source: publisher figshare collection journal article supplement (https://acs.figshare.com/ndownloader/files/4009339)
Supplement: Supplementary file 1 [file 4009339]

**Supporting Information for “A Chimeric p53 Evades Mutant p53 Transdominant Inhibition in Cancer Cells”**

*Abood Okal, Mohanad Mossalam, Karina J. Matissek, Andrew S. Dixon, Philip J. Moo, Carol S. Lim*

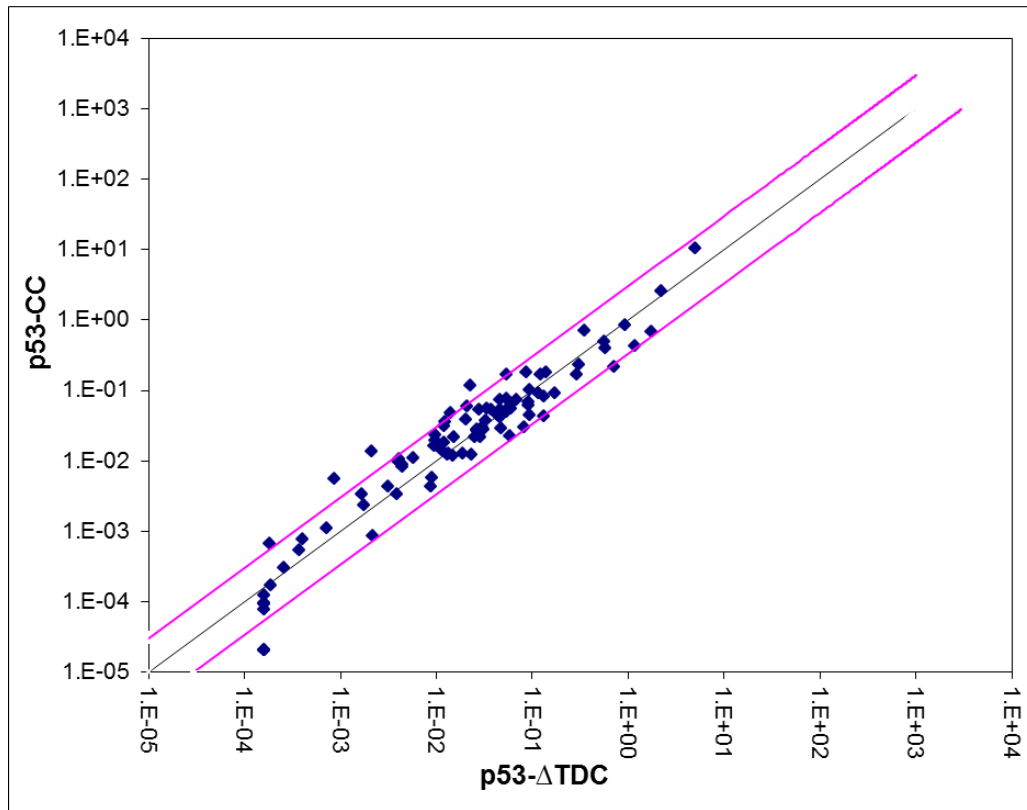

**Supplementary Figure 1:** Scatter plot representation of mRNA levels of 84 p53 target genes in T47D cells transfected with p53-CC or p53-ΔTDC. Each dot represents one of the 84 genes assayed in this PCR array. The two magenta lines represent a boundary of two fold upregulation or downregulation in mRNA levels. Cells treated with p53-CC vs. p53-ΔTDC showed very different expression profiles. This indicates that p53-CC is successful at forming the transcriptionally active tetrameric unit of p53, while the monomeric p53 (p53-ΔTDC) is not.

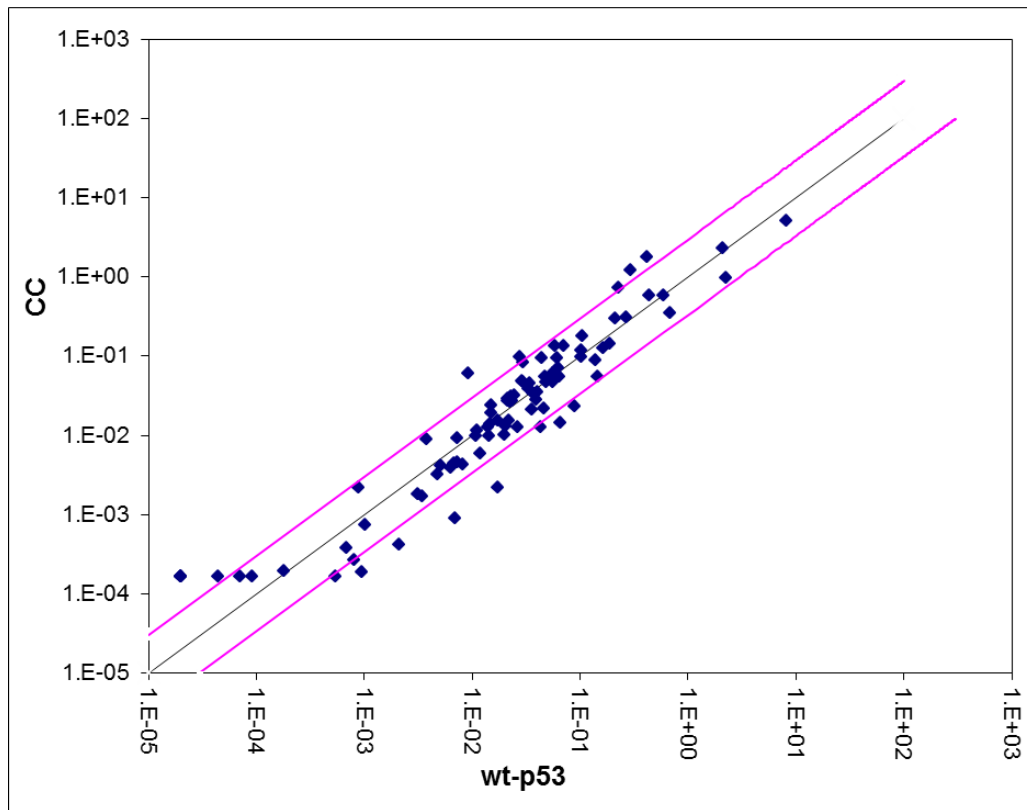

**Supplementary Figure 2:** Scatter plot representation of mRNA levels of 84 p53 target genes in T47D cells transfected with CC or wt-p53. Each dot represents one of the 84 genes assayed in this PCR array. The two magenta lines represent a boundary of two fold upregulation or downregulation in mRNA levels. Cells treated with CC vs. wt-p53 showed very different expression profiles. This indicates that CC fails to activate p53 target genes and can serve as a negative control.
